# Supplementary material
Source: PubMed Central journal article supplement (PMC5786771)
Supplement: AAC.01489-17_zac002186870s1.pdf [file AAC.01489-17_zac002186870s1.pdf]

**Table S1** Primers used in this study

| Use                                                      | Primer # | Name                   | Primer Sequence                                         |
|----------------------------------------------------------|----------|------------------------|---------------------------------------------------------|
| Amplification of TgAtg8 from cDNA                        | 1        | Atg8 CDS Fw            | CCATCGATTGCGACGAAGTG                                    |
|                                                          | 2        | Atg8 CDS Rev           | TTACCCAGAGTGTCTCTGAAGAGTATTCC                           |
| Adding cMyc N-terminal Tag                               | 3        | Atg8 CDS Add cMyc Fw   | AAAATGGAGCAGAAGCTCATCTCCGAGGAGGACCTGCCATCGATTGCGACGAAGT |
| Adding Infusion Cloning overhangs                        | 4        | Atg8 cMyc Infusion Fw  | GAAAAACAAAATGGAGCAGAAGCTCATCTCC                         |
|                                                          | 5        | Atg8 cMyc Infusion Rev | GCAGCTCGAGTCTAGATTACCCAGAGTGTCTCTGAAGAGT                |
| Amplification of Homology Sequences for Infusion Cloning | 6        | Atg8 5' 1.5 kb Fw      | GCGAATTGGGTACCGGGCCCGTAGGGGACCACCGAACAGC                |
|                                                          | 7        | Atg8 5' 1.5 kb Rev     | TCCATTTTGTTCCTCAAGACGGCGAATATCTGGT                      |
|                                                          | 8        | Atg8 3' 1.3 kb Fw      | CGCGCCGGCGCCGATATCGGGAGTGTGCGGCC                        |
|                                                          | 9        | Atg8 3' 1.3 kb Rev     | GAGCTCCCCGGGGATATCGCATACCACACTGGGACGC                   |
| Amplification of SAG1 3'UTR for Infusion Cloning         | 10       | SAG1 3' UTR Fw         | GTAATCTAGACTCGAGATCACCGTTGTGCTCACTTCTCA                 |
|                                                          | 11       | SAG1 3' UTR Rev        | ATTGCATATGGCTAGCCAAGAATTGTGTTAACCGGTTGACTAAAAC          |
| Screening of TgAtg8 locus for recombination              | 12       | Atg8 500 bp US Fw      | TGCATCCAATCTCGGAATTAAGTTTCG                             |
|                                                          | 13       | Atg8 150 bp DS Rev     | TGCGAATGGCTAATGGGACATTATTCCG                            |
|                                                          | 14       | Atg8 Intron 2 Rev      | TCCCAGGGCACCTATGGAAGA                                   |
